# Supplementary material
Source: PubMed Central journal article supplement (PMC6150656)
Supplement: bi7b00902_si_001.pdf [file bi7b00902_si_001.pdf]

# **Tuning the flexibility of glycine-serine linkers to allow rational design of multidomain proteins – Supporting information**

**Martijn van Rosmalen, Mike Krom and Maarten Merkx\***

\* corresponding author: [m.merkx@tue.nl](mailto:m.merkx@tue.nl)

## **Contents**

|                                                                                                                      |    |
|----------------------------------------------------------------------------------------------------------------------|----|
| Supplementary Figure S1 Sequences of proteins used in this study                                                     | S2 |
| Supplementary Figure S2 Relationship between direct EYFP excitation at 514 and 420 nm                                | S4 |
| Supplementary Figure S3 Comparison of experimental FRET efficiencies with those predicted with Gaussian Chain models | S4 |
| Supplementary References                                                                                             | S4 |

CLY- (GS<sub>5</sub>)<sub>9</sub>

atgggcagcagccatcatcatcatcacagcagcggcctgggtgccgcgcgagccatgatggtgagcaagggc  
M G S S H H H H H S S G L V P R G S H M V S K G  
gaggagctgttcaccgggggtggtgcccatcctggtcgagctggacggcgacgtaaaccggccacaagttcagcgtg  
E E L F T G V V P I L V E L D G D V N G H K F S V  
ggcgagggcgagggcgatgccacctcctacggcaagctgacctgaagttcatctgcaccaccggcaagctgccc  
G E G E G D A T S Y G K L T L K F I C T T G K L P  
gtgccctggcccaccctcgtgaccacctgacctggggcgctgcagtgttcagccgctaccccgaccatgaag  
V P W P T L V T T L T W G V Q C F S R Y P D H M K  
cagcagcacttcttcaagtccgccatgcccgaaggctacgtccaggagcgcaccatcttcttcaaggacgacggc  
Q H D F F K S A M P E G Y V Q E R T I F F K D D G  
aactacaagaccgcgcccaggtgaagttcgagggcgacaccctggtgaaccgcatcgagctgaagggcatcgac  
N Y K T R A E V K F E G D T L V N R I E L K G I D  
ttcaaggaggacggcaacatcctggggcacaagctggagtacaactacatcagccacaacgtctatatcaccggc  
F K E D G N I L G H K L E Y N Y I S H N V Y I T A  
gacaagcagaagaacggcatcaaggccaacttcaagatccgccacaacatcgaggacggcagcgtgcagctcgcc  
D K Q K N G I K A N F K I R H N I E D G S V Q L A  
gaccactaccagcagaacacccccatcggcgacggccccgtgctgctgcccgacaaccactacctgagcaccag  
D H Y Q Q N T P I G D G P V L L P D N H Y L S T Q  
tccgccctgagcaaagacccaacgagaagcgcgatcacatggctcctgctggagttcgtgaccgcccggggtac  
S A L S K D P N E K R D H M V L L E F V T A A G I

*EcoRI* *BamHI* *BamHI*  
actctcggcatggacgagctgtacaagtcgggaattcgtagtgatcctcgtcaagctcaggatcctcttcgagc  
T L G M D E L Y K S G I R S G S S S S S S S S S S

*BamHI* *BamHI* *BamHI* *BamHI*  
tcaggatcctcgtcgagctctggatccagcagttcaagcggatcctcttcgagctctggatccagttcaagttcg  
S G S S S S S S S S S S S S S S S S S S S S S S S S

*BamHI* *BamHI* *BamHI* *SacII*

ggatccagctcttctagtgatcctctagtagctcgggatccagttcaagcacaaccgggatgggtgagcaagggc  
G S S S S S G S S S S S S G S S S S T P R M V S K G  
gaggagctgttcaccgggggtggtgcccatcctggtcgagctggacggcgacgtaaaccggccacaagttcagcgtg  
E E L F T G V V P I L V E L D G D V N G H K F S V  
tccggcgagggcgagggcgatgccacctacggcaagctgacctgaagttcatctgcaccaccggcaagctgccc  
S G E G E G D A T Y G K L T L K F I C T T G K L P  
gtgccctggcccaccctcgtgaccaccttcggctacggcctgcagtgttcgcccgtaccccgaccatgaag  
V P W P T L V T T F G Y G L Q C F A R Y P D H M K  
cagcagcacttcttcaagtccgccatgcccgaaggctacgtccaggagcgcaccatcttcttcaaggacgacggc  
Q H D F F K S A M P E G Y V Q E R T I F F K D D G  
aactacaagaccgcgcccaggtgaagttcgagggcgacaccctggtgaaccgcatcgagctgaagggcatcgac  
N Y K T R A E V K F E G D T L V N R I E L K G I D  
ttcaaggaggacggcaacatcctggggcacaagctggagtacaactacaacagccacaacgtctatatcatggcc  
F K E D G N I L G H K L E Y N Y N S H N V Y I M A  
gacaagcagaagaacggcatcaaggtgaacttcaagatccgccacaacatcgaggacggcagcgtgcagctcgcc  
D K Q K N G I K V N F K I R H N I E D G S V Q L A  
gaccactaccagcagaacacccccatcggcgacggccccgtgctgctgcccgacaaccactacctgagctaccag  
D H Y Q Q N T P I G D G P V L L P D N H Y L S Y Q  
tccgccctgagcaaagacccaacgagaagcgcgatcacatggctcctgctggagttcgtgaccgcccggggtac  
S A L S K D P N E K R D H M V L L E F V T A A G I  
actctcggcatggacgagctgtacaagtgagccaccgcagttcgaaaaataa  
T L G M D E L Y K W S H P Q F E K -

His-tag EYFP  
ECFP Strep-tag  
Linker

Supplementary Figure S1 Sequences of proteins used in this study

CLY-(G<sub>2</sub>S<sub>4</sub>)<sub>9</sub> linker

*EcoRI*      *BamHI*                      *BamHI*                      *BamHI*  
ggaattcgttagtggatcctcgggatcatcaggatcctctgggagctcaggatcctcggg  
G I R S G S S G S S G S S G S S G S S G  
  
                 *BamHI*                      *BamHI*                      *BamHI*μ  
agctctggatccagcgggttcaagcggatcctcagggagctctggatccagtggtagttcg  
S S G S S G S S G S S G S S G S S G S S  
  
*BamHI*                      *BamHI*                      *BamHI*                      *SacII*  
ggatccagcgggatctagtggatcctctggtagttcgggatccagtggtagc ccgcgg  
G S S G S S G S S G S S G S S G S P R

CLY-(S<sub>6</sub>)<sub>9</sub> linker

*EcoRI*      *SacI*                      *SacI*                      *SacI*  
ggaattcgttccgagctcatccagttcttcgagctctagttcctcatcgcagctcctccagc  
G I R S S S S S S S S S S S S S S S S S  
  
                 *SacI*                      *SacI*                      *SacI*  
tcatcgcagctcaagttcatcctcgcagctcttcgctcatcttcgcagctctccagtagttcg  
S S S S S S S S S S S S S S S S S S S  
  
*SacI*                      *SacI*                      *SacI*                      *SacII*  
agctctagttcgtcctcgcagctcatcttcaagttcgcagctccagttcatccaca ccgcgg  
S S S S S S S S S S S S S S S S S S T P R

Supplementary Figure S1 (continued) Sequences of proteins used in this study.

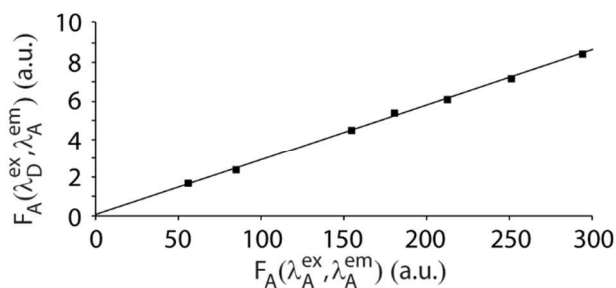

### Supplementary Figure S2 Relationship between direct EYFP excitation at 514 and 420 nm.

Fluorescence intensities for a concentration series of 100, 140, 230, 260, 310, 350 and 400 nM EYFP in 20 mM TrisHCl pH 8.0 containing 100 mM NaCl, 20 mM EDTA and 10% (v/v) glycerol, exciting at 420 nm (vertical axis) or at 514 nm (horizontal axis). Emission was recorded from 523 nm to 533 nm in both cases. A straight line was fit through the data (Equation 2 in the main text).

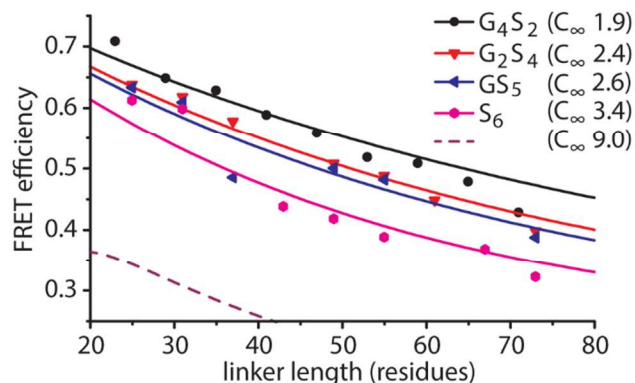

**Supplementary Figure S3 Comparison of experimental FRET efficiencies with those predicted with Gaussian Chain models.** Symbols show  $E_{obs}$  for all CLY proteins. Solid lines represent best fit of modelled  $\langle E \rangle_{ensemble}$  vs. linker length curves with indicated values of  $C_{\infty}$ . The purple dashed line ( $C_{\infty} = 9$ ) is the modelled FRET efficiency vs. linker length curve for polyserine according to the Flory model<sup>1,2</sup>.

### Supplementary References

- (1) Brant, D. A., and Flory, P. J. (1965) The configuration of random polypeptide chains. II. Theory. *J. Am. Chem. Soc.* 87, 2791–2800.
- (2) Miller, W. G., Brant, D. A., and Flory, P. J. (1967) Random coil configurations of polypeptide copolymers. *J. Mol. Biol.* 23, 67–80.
